# Supplementary material for: Medical ward round competence in internal medicine – an interview study towards an interprofessional development of an Entrustable Professional Activity (EPA)
Source: PubMed Central journal article supplement (PMC4940908; doi:10.1186/s12909-016-0697-y), 2016-07-11
Supplement: 12909_2016_697_MOESM2_ESM.pdf [file 12909_2016_697_MOESM2_ESM.pdf]

Leadership skills  
( Com, Coll, M)

- Trainee shows empathy when appropriate (e.g. reflects patient’s emotions, keeps professional distance, takes time for the patient, shows concern).

Capability to lead the ward round team.

- Trainee involves other team members in the ward round process (e.g. asks about their opinion).
- Trainee assigns tasks to members of the ward round team, e.g. through communication with the nurses.

Capability to lead the patient.

- Trainee communicates directly with the patient.
- Trainee encourages the patient to ask questions.
- Trainee assesses patient’s need for information and adapts the amount and kind of imparted information to these needs.

Management of  
difficult situation and  
faults  
(Coll, M)

Capability to deal with interruptions.

- Trainee recognizes and assesses the relevance of interruptions.\*\*
- Trainee reacts adequately to interruptions (e.g. pauses the ward round if necessary).

Capability to deal with faults.

- Trainee recognizes and assesses the relevance of faults.\*\*
- Trainee reacts adequately to faults (e.g. accepts hints regarding potential faults, informs patient/chief resident, gives the reason for the fault and corrects the fault).

Capability to deal with conflicts within the ward round team.

- Trainee recognizes conflicts within the ward round team.\*\*
- Trainee reacts adequately to conflicts within the ward round team.

Organization  
competence  
(Com, Coll, M)

Capability to determine the general framework of the ward round.

- Trainee conducts a well-structured ward round (e.g. prepares the ward round, follows a standardized procedure inside and outside of the patient’s room)
- Trainee adapts the ward round process to the ward round team composition.
- Trainee utilizes adequate tools (e.g. trolley with medical records, notepads).

Capability to organize and use time efficiently.

- Trainee adapts duration of the consultation to the patient (e.g. longer when emotional or medical needs).

|  |  |    |  |  |
|--|--|----|--|--|
|  |  |    |  |  |
|  |  |    |  |  |
|  |  |    |  |  |
|  |  |    |  |  |
|  |  |    |  |  |
|  |  |    |  |  |
|  |  |    |  |  |
|  |  |    |  |  |
|  |  |    |  |  |
|  |  |    |  |  |
|  |  |    |  |  |
|  |  |    |  |  |
|  |  |    |  |  |
|  |  |    |  |  |
|  |  |    |  |  |
|  |  |    |  |  |
|  |  |    |  |  |
|  |  |    |  |  |
|  |  |    |  |  |
|  |  |    |  |  |
|  |  |    |  |  |
|  |  |    |  |  |
|  |  |    |  |  |
|  |  |    |  |  |
|  |  |    |  |  |
|  |  |    |  |  |
|  |  |    |  |  |
|  |  |    |  |  |
|  |  |    |  |  |
|  |  |    |  |  |
|  |  |    |  |  |
|  |  |    |  |  |
|  |  |    |  |  |
|  |  |    |  |  |
|  |  |    |  |  |
|  |  |    |  |  |
|  |  |    |  |  |
|  |  |    |  |  |
|  |  |    |  |  |
|  |  |    |  |  |
|  |  |    |  |  |
|  |  |    |  |  |
|  |  |    |  |  |
|  |  |    |  |  |
|  |  |    |  |  |
|  |  |    |  |  |
|  |  |    |  |  |
|  |  |    |  |  |
|  |  |    |  |  |
|  |  |    |  |  |
|  |  |    |  |  |
|  |  |    |  |  |
|  |  |    |  |  |
|  |  |    |  |  |
|  |  |    |  |  |
|  |  |    |  |  |
|  |  |    |  |  |
|  |  |    |  |  |
|  |  |    |  |  |
|  |  |    |  |  |
|  |  |    |  |  |
|  |  |    |  |  |
|  |  |    |  |  |
|  |  |    |  |  |
|  |  |    |  |  |
|  |  |    |  |  |
|  |  |    |  |  |
|  |  |    |  |  |
|  |  |    |  |  |
|  |  |    |  |  |
|  |  |    |  |  |
|  |  |    |  |  |
|  |  |    |  |  |
|  |  |    |  |  |
|  |  |    |  |  |
|  |  |    |  |  |
|  |  |    |  |  |
|  |  |    |  |  |
|  |  |    |  |  |
|  |  |    |  |  |
|  |  |    |  |  |
|  |  |    |  |  |
|  |  |    |  |  |
|  |  |    |  |  |
|  |  |    |  |  |
|  |  |    |  |  |
|  |  |    |  |  |
|  |  |    |  |  |
|  |  |    |  |  |
|  |  |    |  |  |
|  |  |    |  |  |
|  |  |    |  |  |
|  |  |    |  |  |
|  |  |    |  |  |
|  |  |    |  |  |
|  |  |    |  |  |
|  |  |    |  |  |
|  |  |    |  |  |
|  |  |    |  |  |
|  |  |    |  |  |
|  |  |    |  |  |
|  |  |    |  |  |
|  |  |    |  |  |
|  |  |    |  |  |
|  |  |    |  |  |
|  |  |    |  |  |
|  |  |    |  |  |
|  |  |    |  |  |
|  |  |    |  |  |
|  |  |    |  |  |
|  |  |    |  |  |
|  |  |    |  |  |
|  |  |    |  |  |
|  |  |    |  |  |
|  |  |    |  |  |
|  |  |    |  |  |
|  |  |    |  |  |
|  |  |    |  |  |
|  |  |    |  |  |
|  |  |    |  |  |
|  |  |    |  |  |
|  |  |    |  |  |
|  |  |    |  |  |
|  |  |    |  |  |
|  |  |    |  |  |
|  |  |    |  |  |
|  |  |    |  |  |
|  |  |    |  |  |
|  |  |    |  |  |
|  |  |    |  |  |
|  |  |    |  |  |
|  |  |    |  |  |
|  |  |    |  |  |
|  |  |    |  |  |
|  |  |    |  |  |
|  |  |    |  |  |
|  |  |    |  |  |
|  |  |    |  |  |
|  |  |    |  |  |
|  |  |    |  |  |
|  |  |    |  |  |
|  |  |    |  |  |
|  |  |    |  |  |
|  |  |    |  |  |
|  |  |    |  |  |
|  |  |    |  |  |
|  |  |    |  |  |
|  |  |    |  |  |
|  |  |    |  |  |
|  |  |    |  |  |
|  |  |    |  |  |
|  |  |    |  |  |
|  |  |    |  |  |
|  |  |    |  |  |
|  |  |    |  |  |
|  |  |    |  |  |
|  |  |    |  |  |
|  |  |    |  |  |
|  |  |    |  |  |
|  |  |    |  |  |
|  |  |    |  |  |
|  |  |    |  |  |
|  |  |    |  |  |
|  |  |    |  |  |
|  |  |    |  |  |
|  |  |    |  |  |
|  |  |    |  |  |
|  |  |    |  |  |
|  |  |    |  |  |
|  |  |    |  |  |
|  |  |    |  |  |
|  |  |    |  |  |
|  |  |    |  |  |
|  |  |    |  |  |
|  |  |    |  |  |
|  |  |    |  |  |
|  |  |    |  |  |
|  |  |    |  |  |
|  |  |    |  |  |
|  |  |    |  |  |
|  |  |    |  |  |
|  |  |    |  |  |
|  |  |    |  |  |
|  |  |    |  |  |
|  |  |    |  |  |
|  |  |    |  |  |
|  |  |    |  |  |
|  |  |    |  |  |
|  |  |    |  |  |
|  |  |    |  |  |
|  |  |    |  |  |
|  |  |    |  |  |
|  |  |    |  |  |
|  |  |    |  |  |
|  |  |    |  |  |
|  |  |    |  |  |
|  |  |    |  |  |
|  |  |    |  |  |
|  |  |    |  |  |
|  |  |    |  |  |
|  |  |    |  |  |
|  |  |    |  |  |
|  |  |    |  |  |
|  |  |    |  |  |
|  |  |    |  |  |
|  |  |    |  |  |
|  |  |    |  |  |
|  |  |    |  |  |
|  |  |    |  |  |
|  |  |    |  |  |
|  |  |    |  |  |
|  |  |    |  |  |
|  |  |    |  |  |
|  |  |    |  |  |
|  |  |    |  |  |
|  |  |    |  |  |
|  |  |    |  |  |
|  |  |    |  |  |
|  |  |    |  |  |
|  |  |    |  |  |
|  |  |    |  |  |
|  |  |    |  |  |
|  |  |    |  |  |
|  |  |    |  |  |
|  |  |    |  |  |
|  |  |    |  |  |
|  |  |    |  |  |
|  |  |    |  |  |
|  |  |    |  |  |
|  |  |    |  |  |
|  |  |    |  |  |
|  |  |    |  |  |
|  |  |    |  |  |
|  |  |    |  |  |
|  |  |    |  |  |
|  |  |    |  |  |
|  |  |    |  |  |
|  |  |    |  |  |
|  |  |    |  |  |
|  |  |    |  |  |
|  |  |    |  |  |
|  |  |    |  |  |
|  |  |    |  |  |
|  |  |    |  |  |
|  |  |    |  |  |
|  |  |    |  |  |
|  |  |    |  |  |
|  |  |    |  |  |
|  |  |    |  |  |
|  |  |    |  |  |
|  |  |    |  |  |
|  |  |    |  |  |
|  |  |    |  |  |
|  |  |    |  |  |
|  |  |    |  |  |
|  |  |    |  |  |
|  |  |    |  |  |
|  |  |    |  |  |
|  |  |    |  |  |
|  |  |    |  |  |
|  |  |    |  |  |
|  |  |    |  |  |
|  |  |    |  |  |
|  |  |    |  |  |
|  |  |    |  |  |
|  |  |    |  |  |
|  |  |    |  |  |
|  |  |    |  |  |
|  |  |    |  |  |
|  |  |    |  |  |
|  |  |    |  |  |
|  |  |    |  |  |
|  |  |    |  |  |
|  |  |    |  |  |
|  |  |    |  |  |
|  |  |    |  |  |
|  |  |    |  |  |
|  |  |    |  |  |
|  |  |    |  |  |
|  |  |    |  |  |
|  |  |    |  |  |
|  |  |    |  |  |
|  |  |    |  |  |
|  |  |    |  |  |
|  |  |    |  |  |
|  |  |    |  |  |
|  |  |    |  |  |
|  |  |    |  |  |
|  |  |    |  |  |
|  |  |    |  |  |
|  |  |    |  |  |
|  |  |    |  |  |
|  |  |    |  |  |
|  |  |    |  |  |
|  |  |    |  |  |
|  |  |    |  |  |
|  |  |    |  |  |
|  |  |    |  |  |
|  |  |    |  |  |
|  |  |    |  |  |
|  |  |    |  |  |
|  |  |    |  |  |
|  |  |    |  |  |
|  |  |    |  |  |
|  |  |    |  |  |
|  |  |    |  |  |
|  |  |    |  |  |
|  |  |    |  |  |
|  |  |    |  |  |
|  |  |    |  |  |
|  |  |    |  |  |
|  |  |    |  |  |
|  |  |    |  |  |
|  |  |    |  |  |
|  |  |    |  |  |
|  |  |    |  |  |
|  |  |    |  |  |
|  |  |    |  |  |
|  |  |    |  |  |
|  |  |    |  |  |
|  |  |    |  |  |
|  |  |    |  |  |
|  |  |    |  |  |
|  |  |    |  |  |
|  |  |    |  |  |
|  |  |    |  |  |
|  |  |    |  |  |
|  |  |    |  |  |
|  |  |    |  |  |
|  |  |    |  |  |
|  |  |    |  |  |
|  |  |    |  |  |
|  |  |    |  |  |
|  |  |    |  |  |
|  |  |    |  |  |
|  |  |    |  |  |
|  |  |    |  |  |
|  |  |    |  |  |
|  |  |    |  |  |
|  |  |    |  |  |
|  |  |    |  |  |
|  |  |    |  |  |
|  |  |    |  |  |
|  |  |    |  |  |
|  |  |    |  |  |
|  |  |    |  |  |
|  |  |    |  |  |
|  |  |    |  |  |
|  |  |    |  |  |
|  |  |    |  |  |
|  |  |    |  |  |
|  |  |    |  |  |
|  |  |    |  |  |
|  |  |    |  |  |
|  |  |    |  |  |
|  |  |    |  |  |
|  |  |    |  |  |
|  |  |    |  |  |
|  |  |    |  |  |
|  |  |    |  |  |
|  |  |    |  |  |
|  |  |    |  |  |
|  |  |    |  |  |
|  |  |    |  |  |
|  |  |    |  |  |
|  |  |    |  |  |
|  |  |    |  |  |
|  |  |    |  |  |
|  |  |    |  |  |
|  |  |    |  |  |
|  |  |    |  |  |
|  |  |    |  |  |
|  |  |    |  |  |
|  |  |    |  |  |
|  |  |    |  |  |
|  |  |    |  |  |
|  |  |    |  |  |
|  |  |    |  |  |
|  |  |    |  |  |
|  |  |    |  |  |
|  |  |    |  |  |
|  |  |    |  |  |
|  |  |    |  |  |
|  |  |    |  |  |
|  |  |    |  |  |
|  |  |    |  |  |
|  |  |    |  |  |
|  |  |    |  |  |
|  |  |    |  |  |
|  |  |    |  |  |
|  |  |    |  |  |
|  |  |    |  |  |
|  |  |    |  |  |
|  |  |    |  |  |
|  |  |    |  |  |
|  |  |    |  |  |
|  |  |    |  |  |
|  |  |    |  |  |
|  |  |    |  |  |
|  |  |    |  |  |
|  |  |    |  |  |
|  |  |    |  |  |
|  |  |    |  |  |
|  |  |    |  |  |
|  |  |    |  |  |
|  |  |    |  |  |
|  |  |    |  |  |
|  |  |    |  |  |
|  |  |    |  |  |
|  |  |    |  |  |
|  |  |    |  |  |
|  |  |    |  |  |
|  |  |    |  |  |
|  |  |    |  |  |
|  |  | </ |  |  |
